# Supplementary material for: Pangenomic type III effector database of the plant pathogenic Ralstonia spp.
Source: PeerJ journal article supplement (doi:10.7717/peerj.7346), 2019-08-06

# Pannel A

## BACTERIAL PELLETS

GMI1000::RipBM<sub>CMR15</sub>-3HA  
*hreV* mutant ::RipBM<sub>CMR15</sub>-3HA  
GMI1000::RipBM<sub>Ps107</sub>-3HA  
*hreV* mutant ::RipBM<sub>Ps107</sub>-3HA

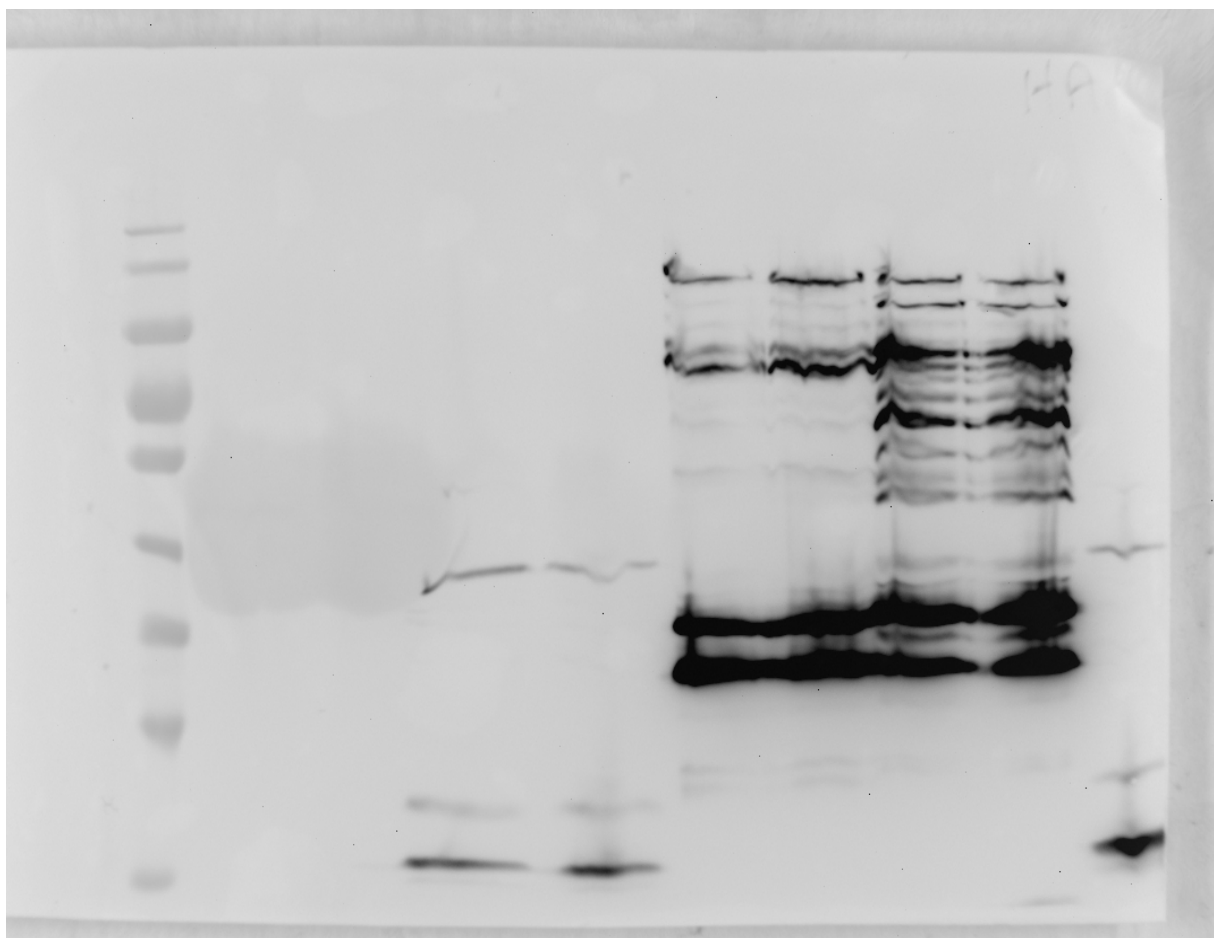

# Pannel A

## SECRETED PROTEINS

GMI1000::RipBM<sub>CMR15</sub>-3HA

*hrcV* mutant ::RipBM<sub>CMR15</sub>-3HA

GMI1000::RipBM<sub>Psi07</sub>-3HA

*hrcV* mutant ::RipBM<sub>Psi07</sub>-3HA

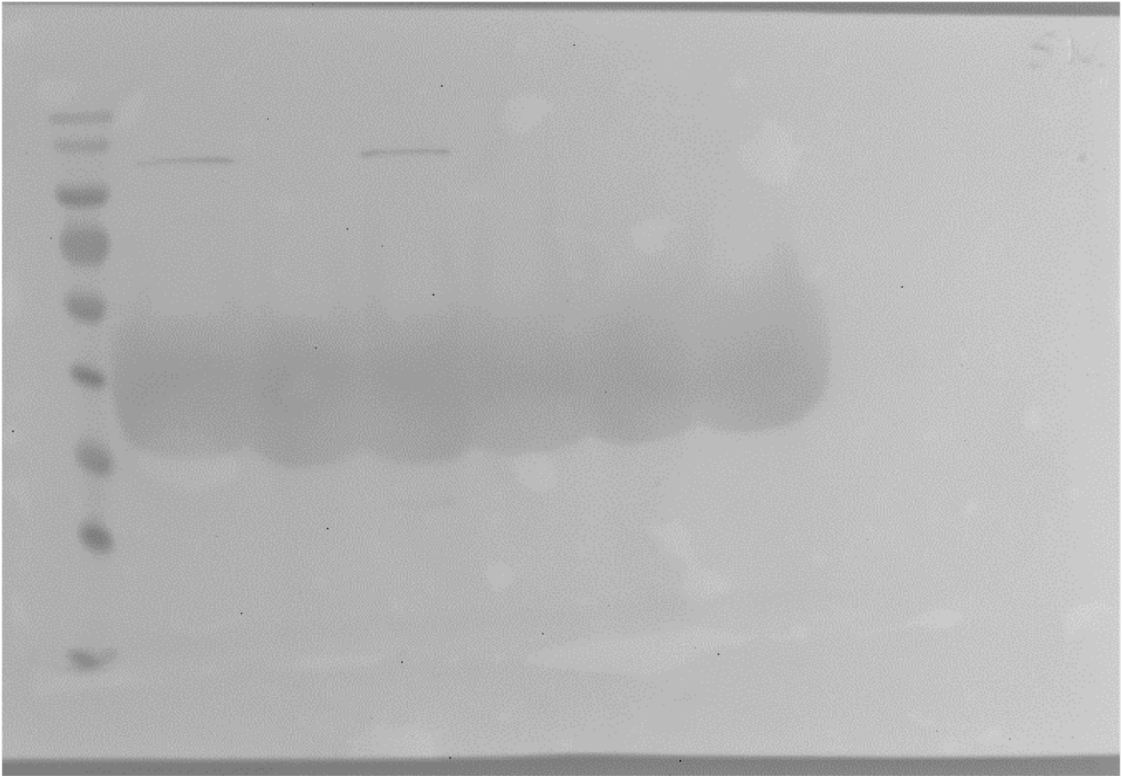

**Pannel B**

**SECRETED PROTEINS**

**BACTERIAL PELLETS**

*GMI1000::RipBO-3HA*  
*hrcV mutant::RipBO-3HA*

*GMI1000::RipBO-3HA*  
*hrcV mutant::RipBO-3HA*

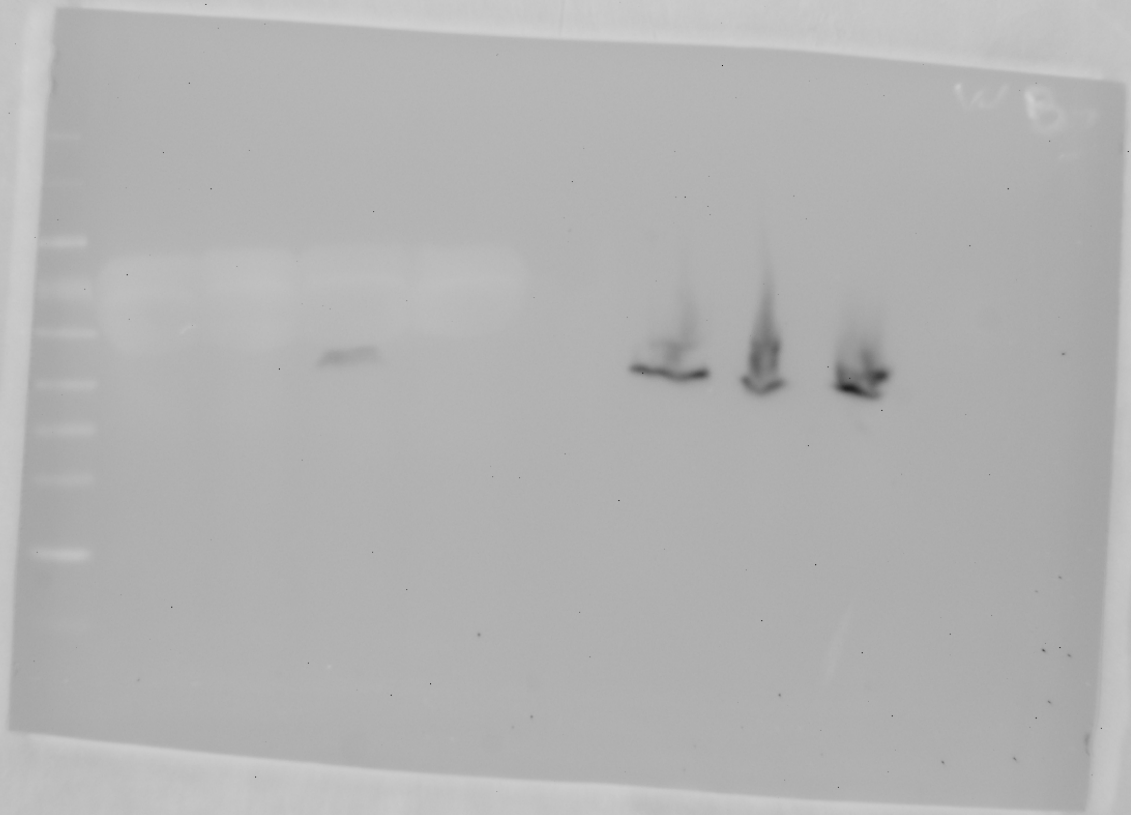

Supplement: FigureS2.pdf [file FigureS2.pdf]
